# Supplementary material for: Cationic Peptides Facilitate Iron-induced Mutagenesis in Bacteria
Source: PubMed Central journal article supplement (PMC4592263; doi:10.1371/journal.pgen.1005546), 2015-10-02
Supplement: pgen.1005546.s008.pdf [file pgen.1005546.s008.pdf]

**Table S1. Mutations in *glpT* of Fos-R *P. aeruginosa* PA14 clones treated with iron, LL-37 and LL-37+Fe<sup>2+</sup>**

| Treatment | Mutant number | Mutation position <sup>1</sup>     | Amino acid change <sup>2</sup> | Protein stability ddG Value <sup>3</sup> | Protein domain <sup>4</sup> |
|-----------|---------------|------------------------------------|--------------------------------|------------------------------------------|-----------------------------|
| Iron      | 1             | G230 to A transition               | G77 to D                       | -1.09 Large Decrease of Stability        | TMhelix                     |
|           | 2             | A220TCGCC225, deletion 6 bp        | deletion of I74- A75           | NA                                       | TMhelix                     |
|           | 3             | A846 to T transversion             | E282 to V                      | 0.08 Increase of Stability               | outside                     |
|           | 4             | G185 to A transition               | R62 to H                       | -1.33 Large Decrease of Stability        | outside                     |
|           | 5             | A846 to T transversion             | E282 to V                      | 0.08 Increase of Stability               | outside                     |
|           | 6             | G250 to T transversion             | G84 to C                       | -1.38 Large Decrease of Stability        | TMhelix                     |
|           | 7             | G409 to A                          | G137 to S                      | -1.01 Large Decrease of Stability        | TMhelix                     |
|           | 8             | T908 to C transition               | I303 to T                      | -2.05 Large Decrease of Stability        | TMhelix                     |
|           | 9             | T823 to A transversion             | W275 to R                      | -1.09 Large Decrease of Stability        | outside                     |
|           | 10            | A220TCGCC225, deletion 6 bp        | deletion of I74- A75           | NA                                       | TMhelix                     |
|           | 11            | A220TCGCC225, deletion 6 bp        | deletion of I74- A75           | NA                                       | TMhelix                     |
|           | 12            | T149 to C transition               | L50 to P                       | -1.91 Large Decrease of Stability        | outside                     |
|           | 13            | A220TCGCC225, deletion 6 bp        | deletion of I74- A75           | NA                                       | TMhelix                     |
|           | 14            | A220TCGCC225, deletion 6 bp        | deletion of I74- A75           | NA                                       | TMhelix                     |
|           | 15            | A220TCGCC225, deletion 6 bp        | deletion of I74- A75           | NA                                       | TMhelix                     |
|           | 16            | A220TCGCC225, deletion 6 bp        | deletion of I74- A75           | NA                                       | TMhelix                     |
|           | 17            | A220TCGCC225, deletion 6 bp        | deletion of I74- A75           | NA                                       | TMhelix                     |
|           | 18            | G409 to T                          | G137 to C                      | -0.84 Large Decrease of Stability        | TMhelix                     |
|           | 19            | T524 to C transition               | L175 to P                      | -1.06 Large Decrease of Stability        | TMhelix                     |
|           | 20            | G647 to A transition               | G216 to D                      | -1.03 Large Decrease of Stability        | inside                      |
| LL-37     | 1             | A496 to G transition               | N166 to D                      | -0.08 Decrease of Stability              | TMhelix                     |
|           | 2             | A220TCGCC225, deletion 6 bp        | deletion of I74- A75           | NA                                       | TMhelix                     |
|           | 3             | A1006 to C transversion            | T336 to P                      | -0.70 Large Decrease of Stability        | TMhelix                     |
|           | 4             | A401 to T transversion             | Q134 to L                      | -0.10 Decrease of Stability              | TMhelix                     |
|           | 5             | A220TCGCC225, deletion 6 bp        | deletion of I74- A75           | NA                                       | TMhelix                     |
|           | 6             | T524 to C transition               | L175 to P                      | -1.06 Large Decrease of Stability        | TMhelix                     |
|           | 7             | A220TCGCC225, deletion 6 bp        | deletion of I74- A75           | NA                                       | TMhelix                     |
|           | 8             | C894 to A transversion, stop codon | Y298 to stop , truncation      | NA                                       | NA                          |
|           | 9             | A220TCGCC225, deletion 6 bp        | deletion of I74- A75           | NA                                       | TMhelix                     |

|                        |                                |                                  |                           |                                    |         |
|------------------------|--------------------------------|----------------------------------|---------------------------|------------------------------------|---------|
|                        | 10                             | G98 to A transition              | G33 to D                  | -0.95, Large Decrease of Stability | TMhelix |
|                        | 11                             | A220TCGCC225, deletion 6 bp      | deletion of I74- A75      | NA                                 | TMhelix |
|                        | 12                             | G994 to C transversion           | V332 to L                 | -1.30 Large Decrease of Stability  | TMhelix |
|                        | 13                             | G457 to A transition             | E153 to K                 | -0.70 Large Decrease of Stability  | inside  |
|                        | 14                             | G409 to T                        | G137 to C                 | -0.84 Large Decrease of Stability  | TMhelix |
|                        | 15                             | A430 to C transversion           | T144 to P                 | -0.39 Decrease of Stability        | inside  |
|                        | 16                             | G1120 to A transition            | E374 to K                 | -0.49 Decrease of Stability        | Inside  |
|                        | 17                             | G824 to A transition, stop codon | W275 to stop , truncation | NA                                 | outside |
|                        | 18                             | A220TCGCC225, deletion 6 bp      | deletion of I74- A75      | NA                                 | TMhelix |
|                        | 19                             | G913 to A transition             | G305 to S                 | -1.10 Large Decrease of Stability  | TMhelix |
|                        | 20                             | G229 to A transition             | G77 to S                  | -1.23 Large Decrease of Stability  | TMhelix |
| LL-37+Fe <sup>2+</sup> | 1                              | G403 to A transition             | G135 to S                 | -1.05 Large Decrease of Stability  | TMhelix |
|                        | 2                              | C277 to T transition             | R93 to W                  | -0.57 Large Decrease of Stability  | inside  |
|                        | 2                              | G403 to T transversion           | G135 to C                 | -0.90 Large Decrease of Stability  | TMhelix |
|                        | 3                              | C822 to G transversion           | D274 to E                 | -0.08 Decrease of Stability        | outside |
|                        | 4                              | C277 to T transition             | R93 to W                  | -0.57 Large Decrease of Stability  | inside  |
|                        | 5                              | C277 to T transition             | R93 to W                  | -0.57 Large Decrease of Stability  | inside  |
|                        | 6                              | G1183 to A transition            | G395 to S                 | -1.20 Large Decrease of Stability  | TMhelix |
|                        | 7                              | C277 to T transition             | R93 to W                  | -0.57 Large Decrease of Stability  | inside  |
|                        | 8                              | C277 to T transition             | R93 to W                  | -0.57 Large Decrease of Stability  | inside  |
|                        | 9                              | C277 to T transition             | R93 to W                  | -0.57 Large Decrease of Stability  | inside  |
|                        | 10                             | G1184 to A transition            | G395 to D                 | -0.85 Large Decrease of Stability  | TMhelix |
|                        | 11                             | C491 to T transition             | A164 to V                 | 0.01 Increase of Stability         | TMhelix |
|                        | 12                             | C491 to T transition             | A164 to V                 | 0.01 Increase of Stability         | TMhelix |
|                        | 13                             | C822 to G transversion           | D274 to E                 | -0.08 Decrease of Stability        | outside |
|                        | 14                             | C277 to T transition             | R93 to W                  | -0.57 Large Decrease of Stability  | inside  |
|                        | 15                             | C277 to T transition             | R93 to W                  | -0.57 Large Decrease of Stability  | inside  |
|                        | 16                             | C277 to T transition             | R93 to W                  | -0.57 Large Decrease of Stability  | inside  |
|                        | 17                             | C277 to T transition             | R93 to W                  | -0.57 Large Decrease of Stability  | inside  |
| 18                     | T299, deletion 1bp, frameshift | frameshift                       | NA                        | NA                                 |         |

|    |                       |           |                                   |         |
|----|-----------------------|-----------|-----------------------------------|---------|
| 19 | G1183 to A transition | G395 to S | -1.20 Large Decrease of Stability | TMhelix |
| 20 | G403 to T transition  | G135 to C | -0.90 Large Decrease of Stability | TMhelix |

<sup>1</sup> relative to the A in the start ATG codon of the 1347bp-long *glpT* ORF

<sup>2</sup> relative to the first amino acid of the GIpT protein

<sup>3</sup> ddG values are calculated using I-Mutant3.0 software for prediction of the protein stability change upon mutation, available from [http://gpcr.biocomp.unibo.it/~emidio/I-Mutant3.0/I-MutantDDG\\_Help.html](http://gpcr.biocomp.unibo.it/~emidio/I-Mutant3.0/I-MutantDDG_Help.html)

<sup>4</sup> location of transmembrane helices in proteins was predicted using TMHMM Server v. 2.0, available from <http://www.cbs.dtu.dk/services/TMHMM-2.0/>
