# Supplementary material for: Cationic Peptides Facilitate Iron-induced Mutagenesis in Bacteria
Source: PubMed Central journal article supplement (PMC4592263; doi:10.1371/journal.pgen.1005546), 2015-10-02
Supplement: pgen.1005546.s009.pdf [file pgen.1005546.s009.pdf]

**Table S2.**

| Mutation site              | Number of mutants per treatment |      | Two-tailed P-value | Interpretation                              |
|----------------------------|---------------------------------|------|--------------------|---------------------------------------------|
|                            | LL-37                           | Iron |                    |                                             |
| G33 to D                   | 1                               | 0    | > 0.9999           | The groups are not significantly different. |
| L50 to P                   | 0                               | 1    | > 0.9999           | The groups are not significantly different. |
| R62 to H                   | 0                               | 1    | > 0.9999           | The groups are not significantly different. |
| deletion of 6 bp I74 - A75 | 6                               | 8    | 0.7411             | The groups are not significantly different. |
| G77 to D                   | 1                               | 1    | > 0.9999           | The groups are not significantly different. |
| G84 to C                   | 0                               | 1    | > 0.9999           | The groups are not significantly different. |
| R93 to W                   | 0                               | 0    | > 0.9999           | The groups are not significantly different. |
| Q134 to L                  | 1                               | 0    | > 0.9999           | The groups are not significantly different. |
| G135 to S                  | 0                               | 0    | > 0.9999           | The groups are not significantly different. |
| G137 to S                  | 1                               | 2    | > 0.9999           | The groups are not significantly different. |
| T299 frameshift            | 0                               | 0    | > 0.9999           | The groups are not significantly different. |
| T144 to P                  | 1                               | 0    | > 0.9999           | The groups are not significantly different. |
| E153 to K                  | 1                               | 0    | > 0.9999           | The groups are not significantly different. |
| N166 to D                  | 1                               | 0    | > 0.9999           | The groups are not significantly different. |
| A164 to V                  | 0                               | 0    | > 0.9999           | The groups are not significantly different. |
| L175 to P                  | 1                               | 1    | > 0.9999           | The groups are not significantly different. |
| G216 to D                  | 0                               | 1    | > 0.9999           | The groups are not significantly different. |
| D274 to E                  | 0                               | 0    | > 0.9999           | The groups are not significantly different. |
| W275 to R                  | 1                               | 1    | > 0.9999           | The groups are not significantly different. |
| E282 to V                  | 0                               | 2    | 0.4872             | The groups are not significantly different. |
| Y298 to stop, truncation   | 1                               | 0    | > 0.9999           | The groups are not significantly different. |
| I303 to T                  | 0                               | 1    | > 0.9999           | The groups are not significantly different. |
| G305 to S                  | 1                               | 0    | > 0.9999           | The groups are not significantly different. |
| V332 to L                  | 1                               | 0    | > 0.9999           | The groups are not significantly different. |
| T336 to P                  | 1                               | 0    | > 0.9999           | The groups are not significantly different. |
| E374 to K                  | 1                               | 0    | > 0.9999           | The groups are not significantly different. |
| G395 to S                  | 0                               | 0    | > 0.9999           | The groups are not significantly different. |
