# Supplementary material for: Cationic Peptides Facilitate Iron-induced Mutagenesis in Bacteria
Source: PubMed Central journal article supplement (PMC4592263; doi:10.1371/journal.pgen.1005546), 2015-10-02
Supplement: pgen.1005546.s011.pdf [file pgen.1005546.s011.pdf]

**Table S4.**

| Mutation site              | Number of mutants per treatment |                                    | Two-tailed <i>P</i> -value | Interpretation                              |
|----------------------------|---------------------------------|------------------------------------|----------------------------|---------------------------------------------|
|                            | Iron                            | LL- <sup>37</sup> Fe <sup>2+</sup> |                            |                                             |
| G33 to D                   | 0                               | 0                                  | > 0.9999                   | The groups are not significantly different. |
| L50 to P                   | 1                               | 0                                  | > 0.9999                   | The groups are not significantly different. |
| R62 to H                   | 1                               | 0                                  | > 0.9999                   | The groups are not significantly different. |
| deletion of 6 bp I74 - A75 | 8                               | 0                                  | 0.0033                     | The groups are significantly different.     |
| G77 to D                   | 1                               | 0                                  | > 0.9999                   | The groups are not significantly different. |
| G84 to C                   | 1                               | 0                                  | > 0.9999                   | The groups are not significantly different. |
| R93 to W                   | 0                               | 10                                 | 0.0004                     | The groups are significantly different.     |
| Q134 to L                  | 0                               | 0                                  | > 0.9999                   | The groups are not significantly different. |
| G135 to S                  | 0                               | 3                                  | 0.2308                     | The groups are not significantly different. |
| G137 to S                  | 2                               | 0                                  | 0.4872                     | The groups are not significantly different. |
| T299 frameshift            | 0                               | 1                                  | > 0.9999                   | The groups are not significantly different. |
| T144 to P                  | 0                               | 0                                  | > 0.9999                   | The groups are not significantly different. |
| E153 to K                  | 0                               | 0                                  | > 0.9999                   | The groups are not significantly different. |
| N166 to D                  | 0                               | 0                                  | > 0.9999                   | The groups are not significantly different. |
| A164 to V                  | 0                               | 2                                  | 0.4872                     | The groups are not significantly different. |
| L175 to P                  | 1                               | 0                                  | > 0.9999                   | The groups are not significantly different. |
| G216 to D                  | 1                               | 0                                  | > 0.9999                   | The groups are not significantly different. |
| D274 to E                  | 0                               | 2                                  | 0.4872                     | The groups are not significantly different. |
| W275 to R                  | 1                               | 0                                  | > 0.9999                   | The groups are not significantly different. |
| E282 to V                  | 2                               | 0                                  | > 0.9999                   | The groups are not significantly different. |
| Y298 to stop, truncation   | 0                               | 0                                  | > 0.9999                   | The groups are not significantly different. |
| I303 to T                  | 1                               | 0                                  | > 0.9999                   | The groups are not significantly different. |
| G305 to S                  | 0                               | 0                                  | > 0.9999                   | The groups are not significantly different. |
| V332 to L                  | 0                               | 0                                  | > 0.9999                   | The groups are not significantly different. |
| T336 to P                  | 0                               | 0                                  | > 0.9999                   | The groups are not significantly different. |
| E374 to K                  | 0                               | 0                                  | > 0.9999                   | The groups are not significantly different. |
| G395 to S                  | 0                               | 3                                  | 0.2308                     | The groups are not significantly different. |
